# Supplementary material for: Comparison between the Jaeger Oxycon Pro and the COSMED Quark RMR Metabolic Carts for Cardiopulmonary Exercise Testing in the Context of an Aerosol-Borne Infectious Disease
Source: Preprints.org preprint supplement (doi:10.20944/preprints202310.1625.v1), 2023-10-25
Supplement: Supplementary file 1 [file Suppl Tabla 1 GXT Protocols.docx]

**Supplementary table 1.** Cycle-ergometer graded exercise protocols

|  | **Protocol 1:**  *Women >35 years old* | **Protocol 2:**  *Women <35 years old*  *Men >35 years old* | **Protocol 3:**  *Men <35 years old* |
| --- | --- | --- | --- |
| **GXT** | ***Stationary resting period***:  Duration: 5 min | ***Stationary resting period***:  Duration: 5 min | ***Stationary resting period***:  Duration: 5 min |
|  | ***Warm-up period***:  Duration: 5 min  Load: 15W  Pedaling cadence: 50-70 rpm | ***Warm-up period***:  Duration: 5 min  Load: 30W  Pedaling cadence: 50-70 rpm | ***Warm-up period***:  Duration: 5 min  Load: 50W  Pedaling cadence: 50-70 rpm |
|  | ***Load period***:  Duration: until exhaustion  Load: 3W/12s  Pedaling cadence: 60-90 rpm | ***Load period***:  Duration: until exhaustion  Load: 4W/12s  Pedaling cadence: 60-90 rpm | ***Load period***:  Duration: until exhaustion  Load: 5W/12s  Pedaling cadence: 60-90 rpm |
|  | ***Active recovery period***:  Duration: 2 min  Pedaling cadence: self-chosen | ***Active recovery period***:  Duration: 2 min  Pedaling cadence: self-chosen | ***Active recovery period***:  Duration: 2 min  Pedaling cadence: self-chosen |
|  | ***Passive recovery period***:  Duration: 10 min  No pedaling | ***Passive recovery period***:  Duration: 10 min  No pedaling | ***Passive recovery period***:  Duration: 10 min  No pedaling |
|  |  |  |  |
| **Vert** | Total duration: until exhaustion  ***Warm-up period***:  Duration: 30 s  Load: 0 W  Pedaling cadence: 60-90 rpm | Total duration: until exhaustion  ***Warm-up period***:  Duration: 30 s  Load: 0 W  Pedaling cadence: 60-90 rpm | Total duration: until exhaustion  ***Warm-up period***:  Duration: 30 s  Load: 0 W  Pedaling cadence: 60-90 rpm |
|  | ***Submaximal period***:  Duration: 1 min  Load: 50% Wax  Pedaling cadence: 60-90 rpm | ***Submaximal period***:  Duration: 1 min  Load: 50% Wax  Pedaling cadence: 60-90 rpm | ***Submaximal period***:  Duration: 1 min  Load: 50% Wax  Pedaling cadence: 60-90 rpm |
|  | ***Supramaximal period***:  Duration: until exhaustion  Load: 110% Wmax  Pedaling cadence: 60-90 rpm | ***Supramaximal period***:  Duration: until exhaustion  Load: 110% Wmax  Pedaling cadence: 60-90 rpm | ***Supramaximal period***:  Duration: until exhaustion  Load: 110% Wmax  Pedaling cadence: 60-90 rpm |
|  | ***Active recovery period***:  Duration: self-chosen  Pedaling cadence: self-chosen | ***Active recovery period***:  Duration: self-chosen  Pedaling cadence: self-chosen | ***Active recovery period***:  Duration: self-chosen  Pedaling cadence: self-chosen |

Note: GXT: graded exercise test, VerT: verification test.
