# Supplementary material for: Comparison between the Jaeger Oxycon Pro and the COSMED Quark RMR Metabolic Carts for Cardiopulmonary Exercise Testing in the Context of an Aerosol-Borne Infectious Disease
Source: Preprints.org preprint supplement (doi:10.20944/preprints202310.1625.v1), 2023-10-25
Supplement: Supplementary file 2 [file Suppl Tabla 2 12s Differences.docx]

| **Supplementary Table 2.** Differences in ventilatory parameters during CPET, matched by 12-s load stages (W) across the entire range by sex | | | | | | | | | | | | | | |
| --- | --- | --- | --- | --- | --- | --- | --- | --- | --- | --- | --- | --- | --- | --- |
|  | **Men** (n = 22) | | | |  | **Women** (n = 20) | | | |  | **All sample** (n = 42) | | | |
|  |  |  |
|  | ***Quark RMR - Oxycon Pro*** | | | |  | ***Quark RMR - Oxycon Pro*** | | | |  | ***Quark RMR - Oxycon Pro*** | | | |
|  | *Mean Diff* | *±* | *SD* | *P value* |  | *Mean Diff* | *±* | *SD* | *P value* |  | *Mean Diff* | *±* | *SD* | *P value* |
| VO2mean (ml/min) | 15.46 | ± | 217.08 | **0.008** |  | 69.45 | ± | 160.27 | **<0.001** |  | 39.53 | ± | 195.62 | **<0.001** |
| VCO2mean (ml/min) | -13.75 | ± | 234.42 | **0.025** |  | 96.39 | ± | 160.78 | **<0.001** |  | 35.37 | ± | 212.02 | **<0.001** |
| RER | -0.01 | ± | 0.07 | **<0.001** |  | 0.02 | ± | 0.07 | **<0.001** |  | 0.01 | ± | 0.07 | **<0.001** |
| VT (L) | -0.08 | ± | 0.31 | **<0.001** |  | -0.01 | ± | 0.31 | 0.110 |  | -0.06 | ± | 0.31 | **<0.001** |
| BF (1·min-1) | 0.96 | ± | 5.11 | **<0.001** |  | 1.22 | ± | 5.27 | **<0.001** |  | 1.08 | ± | 5.18 | **<0.001** |
| VE (L) | -0.35 | ± | 9.04 | 0.146 |  | 1.66 | ± | 6.68 | **<0.001** |  | 0.55 | ± | 8.13 | **<0.001** |
| PEO2 (kPa) | 0.08 | ± | 0.40 | **<0.001** |  | -0.03 | ± | 0.39 | **0.020** |  | 0.03 | ± | 0.40 | **0.005** |
| PECO2 (kPa) | 0.08 | ± | 0.34 | **<0.001** |  | 0.21 | ± | 0.33 | **<0.001** |  | 0.14 | ± | 0.34 | **<0.001** |
| PETO2 (kPa) | 0.26 | ± | 0.49 | **<0.001** |  | 0.32 | ± | 0.47 | **<0.001** |  | 0.29 | ± | 0.48 | **<0.001** |
| PETCO2 (kPa) | 0.04 | ± | 0.40 | **0.001** |  | -0.02 | ± | 0.38 | 0.067 |  | 0.01 | ± | 0.39 | 0.364 |
| FEO2 (%) | -0.04 | ± | 0.45 | **0.005** |  | -0.13 | ± | 0.43 | **<0.001** |  | -0.08 | ± | 0.44 | **<0.001** |
| FECO2 (%) | 0.06 | ± | 0.38 | **<0.001** |  | 0.21 | ± | 0.37 | **<0.001** |  | 0.13 | ± | 0.37 | **<0.001** |
| FETO2 (%) | 1.56 | ± | 0.57 | **<0.001** |  | 1.38 | ± | 0.54 | **<0.001** |  | 1.49 | ± | 0.56 | **<0.001** |
| FETCO2 (%) | 0.00 | ± | 0.44 | 0.941 |  | -0.06 | ± | 0.42 | **<0.001** |  | -0.03 | ± | 0.43 | **0.003** |
| BF: breathing frequency; FECO2: fraction of expired CO2; FEO2: fraction of expired O2; FETO2: end-tidal fraction of expired O2; FETCO2: end-tidal fraction of expired CO2; PECO2: CO2 pressure; PEO2: O2 pressure; PETCO2: end-tidal CO2 pressure; PETO2: end-tidal O2 pressure; RER: respiratory exchange ratio; SD: standard deviation; VCO2: carbon dioxide production; VCO2: carbon dioxide production; VE: minute ventilation; VO2: oxygen uptake; VT: tidal volume. | | | | | | | | | | | | | | |
| **†Bold**: statistical significance at p≤0.05. | | | | | | | | | | | | | | |
